# Supplementary material
Source: bioRxiv or medRxiv preprint supplement (https://medrxiv.org/highwire/filestream/78636/field_highwire_adjunct_files/0/2020.04.25.20078931-1.pdf)
Supplement: Supplementary file [file 2020.04.25.20078931-1.pdf]

## Supplementary Material

**Supplementary Table 1. ACMG/AMP criteria that were excluded from *TP53*-specific guidelines**

| <b>Original ACMG/AMP criterion</b>                                                                                                                            | <b>Rationale for exclusion</b>                                                                                                                                                                                                                                                    |
|---------------------------------------------------------------------------------------------------------------------------------------------------------------|-----------------------------------------------------------------------------------------------------------------------------------------------------------------------------------------------------------------------------------------------------------------------------------|
| <b>PM3</b> For recessive disorders, detected in trans with a pathogenic variant.                                                                              | Not relevant because LFS is not a recessive disorder, but rather a dominant disorder.                                                                                                                                                                                             |
| <b>PM4</b> Protein length changes as a result of in-frame deletions/insertions in a nonrepeat region or stop-loss variants.                                   | Not used due to limited available data.                                                                                                                                                                                                                                           |
| <b>PP2</b> Missense variant in a gene that has a low rate of benign missense variation and where missense variants are a common mechanism of disease          | Not applicable due to the high rate of benign missense variation in <i>TP53</i> .                                                                                                                                                                                                 |
| <b>PP4</b> Patient's phenotype or family history is highly specific for a disease with a single genetic etiology.                                             | Already captured by the specifications of PS4, and thus cannot be used as independent evidence.                                                                                                                                                                                   |
| <b>PP5</b> Reputable source recently reports variant as pathogenic, but the evidence is not available to the laboratory to perform an independent evaluation. | Not applicable following Sequence Variant Interpretation recommendations (Biesecker & Harrison, 2018).                                                                                                                                                                            |
| <b>BP1</b> Missense variant in a gene for which primarily truncating variants are known to cause disease.                                                     | Not relevant, as truncating variants account for only a portion of disease-causing variants in <i>TP53</i> and there are many pathogenic missense alleles.                                                                                                                        |
| <b>BP3</b> In-frame deletions/insertions in a repetitive region without a known function.                                                                     | Not used due to limited available data                                                                                                                                                                                                                                            |
| <b>BP5</b> Variant found in a case with an alternate molecular basis for disease.                                                                             | Not used at this time as an individual could have multiple hereditary factors to explain a personal and/or family history of cancer. Therefore, having a known <i>ATM</i> pathogenic variant would not eliminate the possibility of also having a <i>TP53</i> pathogenic variant. |
| <b>BP6</b> Reputable source recently reports variant as benign, but the evidence is not available to the laboratory to perform an independent evaluation.     | Not applicable following Sequence Variant Interpretation recommendations (Biesecker & Harrison, 2018).                                                                                                                                                                            |

| Clinical criteria | <i>TP53</i> Carriers |       | Non-carriers |       | Risk Ratio | RR    | 95%-CI         |
|-------------------|----------------------|-------|--------------|-------|------------|-------|----------------|
|                   | Events               | Total | Events       | Total |            |       |                |
| Classic LFS       | 4                    | 298   | 1            | 1160  |            | 15.57 | [1.75; 138.79] |
| Chompret 2015     | 64                   | 298   | 74           | 1160  |            | 3.37  | [2.47; 4.59]   |

**Supplementary Figure 1. Calculation of likelihood ratios of pathogenicity for a variant found in a proband meeting Classic LFS or only Chompret 2015 clinical criteria, using data from Ambry Genetics, where events corresponds to the number of *TP53* carriers or non-carriers meeting each of these clinical criteria**

**Supplementary Table 2. Likelihood ratios (LR) towards pathogenicity for a variant identified in a female individual with no cancer by age 60 for the specification of the BS2 criterion, using data from Ambry Genetics and GeneDx**

| Dataset                                  | Ambry Genetics                     |                            |                   | GeneDx                             |                            |                   |
|------------------------------------------|------------------------------------|----------------------------|-------------------|------------------------------------|----------------------------|-------------------|
| Individuals with no cancer by age 60 (n) | % <i>TP53</i> carriers (n/total N) | % Non-carriers (n/total N) | LR (95% CI)       | % <i>TP53</i> carriers (n/total N) | % Non-carriers (n/total N) | LR (95% CI)       |
|                                          | 12.38 (38/307)                     | 18.62 (210/112)            | 0.66 (0.48; 0.92) | 5.63 (8/142)                       | 19.97 (18936/94807)        | 0.28 (0.14; 0.55) |

**Supplementary Table 3. Likelihood ratios (LR) towards pathogenicity estimated for the original ACMG/AMP PM5 criterion, based on amino acid (aa) residues observations of 493 non-functional and 1239 functional or supertrans variants from yeast transactivation assays**

| <b>Number of occurrences of an aa in the dataset</b> | <b>Number of pathogenic variants at that aa</b> | <b>%</b> | <b>Number of benign variants at the same aa</b> | <b>%</b> | <b>LR (95% CI)</b>   |
|------------------------------------------------------|-------------------------------------------------|----------|-------------------------------------------------|----------|----------------------|
| 1                                                    | 55                                              | 11.16    | 159                                             | 12.83    | 0.87 (0.66, 1.15)    |
| 2                                                    | 52                                              | 10.55    | 45                                              | 3.63     | 2.90 (1.99, 4.24)    |
| 3                                                    | 72                                              | 14.60    | 28                                              | 2.26     | 6.46 (4.26, 9.80)    |
| 4                                                    | 72                                              | 14.60    | 10                                              | 0.81     | 18.09 (9.46, 34.61)  |
| 5                                                    | 145                                             | 29.41    | 10                                              | 0.81     | 36.44 (19.46, 68.25) |
| 6 or more                                            | 97                                              | 19.7     | 0.00                                            | 0.00     | NA                   |

**Supplementary Table 4. Comparison of performance of functional assays against reference sets of assumed pathogenic and benign p53 missense variants based on clinical evidence**

| <b>Given name to the functional assay</b> | <b>Matthews correlation coefficient</b> |
|-------------------------------------------|-----------------------------------------|
| Kato LOF                                  | 0.94                                    |
| Giacomelli LOF (etoposide) + DNE          | 0.88                                    |
| Kotler LOF                                | 0.77                                    |
| Giacomelli LOF (etoposide)                | 0.73                                    |
| Giacomelli DNE (etoposide)                | 0.70                                    |
| Giacomelli LOF (nutlin)                   | 0.34                                    |
